# Supplementary material for: Carboxyl Group-Modified Myoglobin Induces TNF-α-Mediated Apoptosis in Leukemia Cells
Source: MDPI journal article supplement (doi:10.3390/ph15091066), 2022-08-27
Supplement: s1 [file s1]

Table S1. Primers used for qRT-PCR.

| Gene                    | Nucleotide sequence             |
|-------------------------|---------------------------------|
| NOX4 (forward)          | 5'-GGCTGGAGGCATTGGAGTAA-3'      |
| NOX4 (reverse)          | 5'-CCAGTCATCCAACAGGGTGTT-3'     |
| SIRT3 (forward)         | 5'-GACATTCGGGCTGACGTGATGGC-3'   |
| SIRT3 (reverse)         | 5'-CAACCACATGCAGCAAGAACCTCTG-3' |
| TTP (forward)           | 5'-CATCCACAACCCTAGCGAAGACCTG-3' |
| TTP (reverse)           | 5'-CAGAGAAGGCAGAGGGTGACAGTG-3'  |
| TNF- $\alpha$ (forward) | 5'-CTGGAGAAGGGTGACCGACTCAG-3'   |
| TNF- $\alpha$ (reverse) | 5'-TAGACCTGCCCAGACTCGGCAAAG-3'  |
| GAPDH (forward)         | 5'-GAAATCCCATCACCATCTTCCAGG-3'  |
| GAPDH (reverse)         | 5'-GAGCCCCAGCCTTCTCCATG-3'      |

Table S2. Primers used for qRT-PCR of miRs.

| miRs      | Nucleotide sequence                                            |
|-----------|----------------------------------------------------------------|
| miR-25    |                                                                |
| Stem loop | 5'-GTCGTATCCAGTGCAGGGTCCGAGGTATTTCGCAC<br>TGGATACGACTCAGAC-3'  |
| Forward   | 5'-GTATACCATTGCACTTGTCTC-3'                                    |
| Reverse   | 5'-GTGCAGGGTCCGAGGT-3'                                         |
| miR-146a  |                                                                |
| Stem loop | 5'-GTCGTATCCAGTGCAGGGTCCGAGGTATTTCGCAC<br>TGGATACGACAACCCA-3'  |
| Forward   | 5'-GTATACTGAGAACTGAATTCC-3'                                    |
| Reverse   | 5'-GTGCAGGGTCCGAGGT-3'                                         |
| miR-99a   |                                                                |
| Stem loop | 5'-GTCGTATCCAGTGCAGGGTCCGAGGTATTTCGCAC<br>TGGATACGACCACAAG-3'  |
| Forward   | 5'-GTATACAACCCGTAGATCCGA-3'                                    |
| Reverse   | 5'-GTGCAGGGTCCGAGGT-3'                                         |
| miR-137   |                                                                |
| Stem loop | 5'-GTCGTATCCAGTGCAGGGTCCGAGGTATTTCGCAC<br>TGGATACGACCTACGC-3'  |
| Forward   | 5'-GTATACTTATTGCTTAAGAAT-3'                                    |
| Reverse   | 5'-GTGCAGGGTCCGAGGT-3'                                         |
| miR-29a   |                                                                |
| Stem loop | 5'-GTTGGCTCTGGTGCAGGGTCCGAGGTATTTCGCAC<br>CAGAGCCAACTAACCG -3' |
| Forward   | 5'-GTTTGGTAGCACCATCTGAAAT-3'                                   |
| Reverse   | 5'-GTGCAGGGTCCGAGGT-3'                                         |

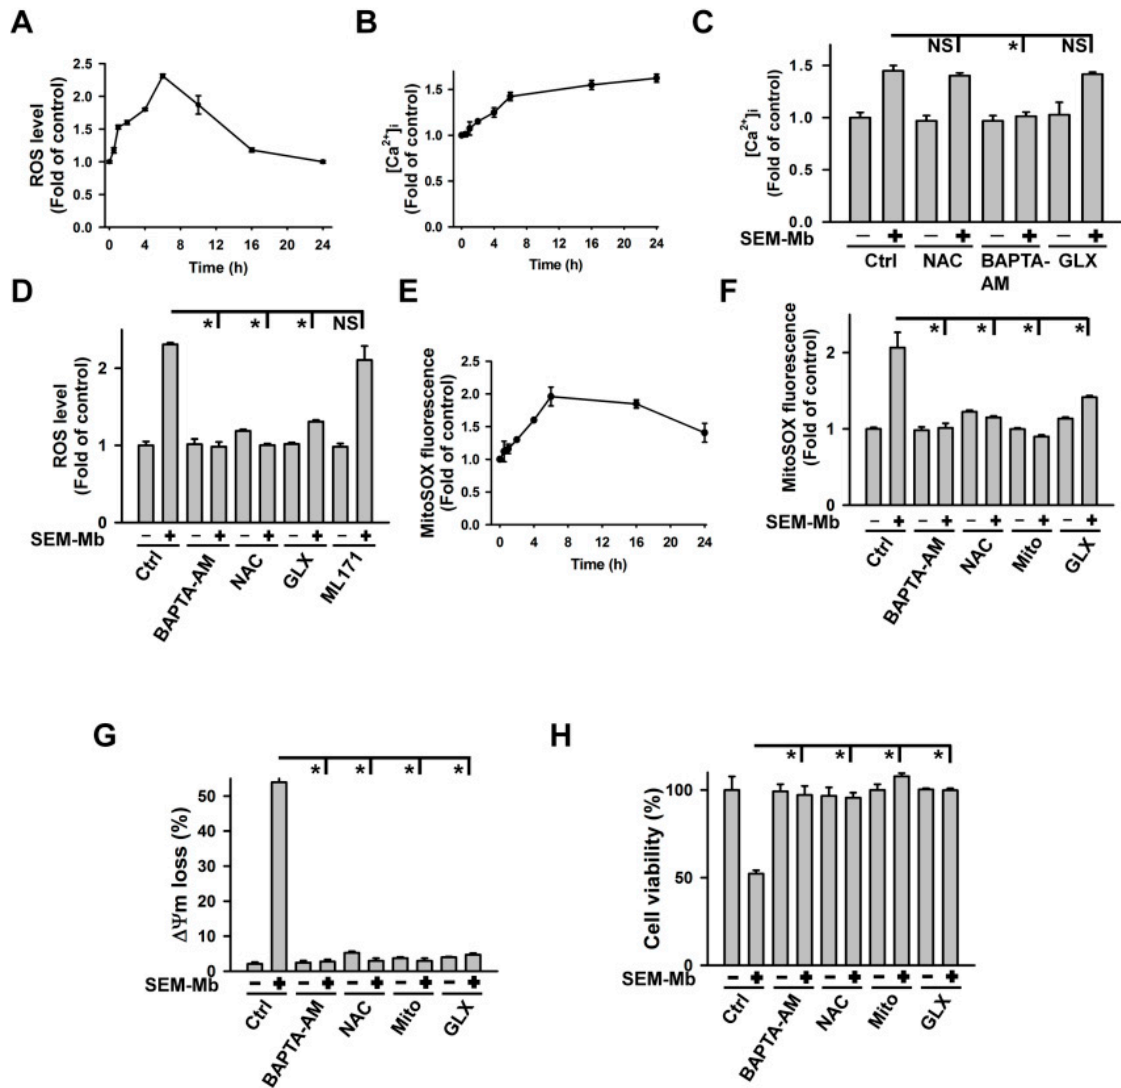

Figure S1. Treatment of U937 cells with SEM-Mb increased intracellular  $Ca^{2+}$  concentration and ROS levels. U937 cells were pre-treated with 2 mM N-acetylcysteine (NAC), 10  $\mu$ M BAPTA-AM, 10  $\mu$ M GLX351322, 10  $\mu$ M ML171, or 10  $\mu$ M Mito-TEMPO for 1 h, and then incubated with 1.5  $\mu$ M SEM-Mb for 6 h (for measuring ROS level and MitoSOX fluorescence) or 24 h (for measuring  $[Ca^{2+}]_i$ , cell viability, and  $\Delta\Psi_m$ ). (A) SEM-Mb induced ROS generation in U937 cells. U937 cells were treated with 1.5  $\mu$ M SEM-Mb for indicated time periods. Results were shown as fold-increase in fluorescence intensity compared with the control group. Each value is the mean $\pm$ SD of three independent experiments with triplicate measurements. (B) SEM-Mb induced an elevation of  $[Ca^{2+}]_i$  in U937 cells. U937 cells were treated with 1.5  $\mu$ M SEM-Mb for indicated time periods.  $[Ca^{2+}]_i$  was quantified by a fluorescence plate reader after loading the cells with a calcium indicator (Fluo-4 AM).

Results were shown as fold-increase in fluorescence intensity compared with the control group. (C) Effect of BAPTA-AM, NAC, and GLX351322 on SEM-Mb-induced an increase in  $[Ca^{2+}]_i$  (mean $\pm$ SD, \* $P$ <0.05; NS, no statistically significant). (D) Effect of BAPTA-AM, NAC, ML-171, and GLX351322 on SEM-Mb-induced ROS generation (mean $\pm$ SD, \* $P$ <0.05; NS, no statistically significant). (E) SEM-Mb induced mitochondrial ROS generation in U937 cells. Mitochondrial ROS levels were measured using mitochondrial superoxide probe MitoSOX Red. The data represent the mean $\pm$ SD. Effect of Mito-TEMPO, BAPTA-AM, NAC, and GLX351322 on SEM-Mb-induced (F) the production of mitochondrial ROS, (G)  $\Delta\Psi_m$  loss, and (H) cell death (mean $\pm$ SD, \* $P$ <0.05).

**A**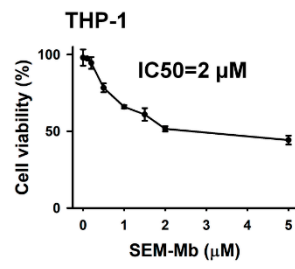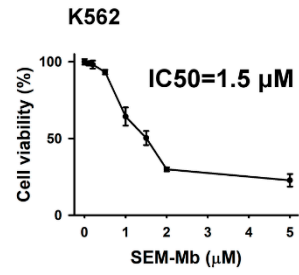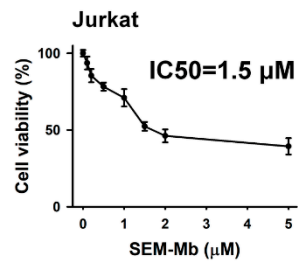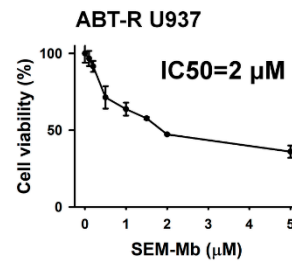**B**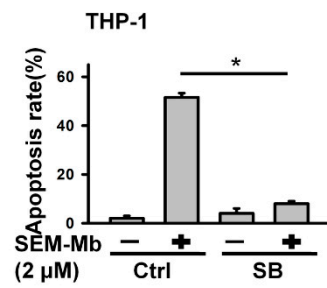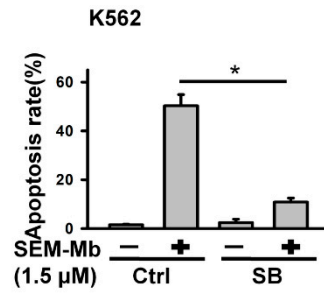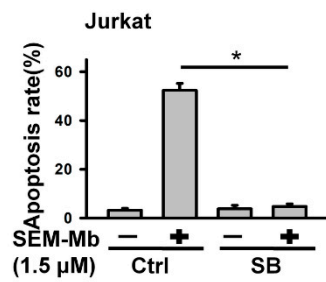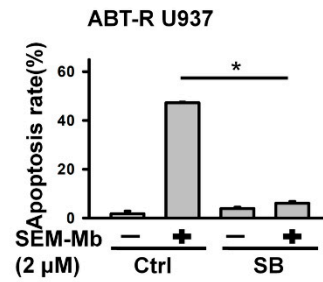

**C**

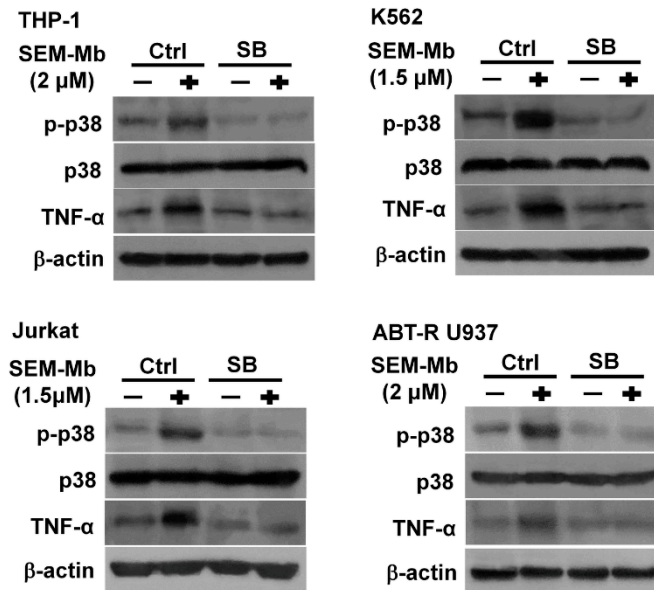

Figure S2. SEM-Mb induced death of THP-1, K562, Jurkat, and ABT-199-resistant U937 cells via p38 MAPK-mediated TNF- $\alpha$  expression. THP-1, K562, Jurkat, and ABT-199-resistant U937 (ABT-R U937) cells were treated with indicated SEM-Mb concentrations for 24 h. (A) SEM-Mb induced cell death in a concentration-dependent manner. THP-1, K562, Jurkat, and ABT-R U937 cells were incubated with varying concentrations of SEM-Mb for 24 h. Cell viability was determined by MTT assay. Results are expressed as the percentage of cell survival relative to the control. Each value is the mean $\pm$ SD of triplicate determinations. (B) Effect of SB202190 on SEM-Mb-induced apoptosis in THP-1, K562, Jurkat, and ABT-R U937 cells. The cells were pretreated with 10  $\mu$ M SB202190 for 1 h, and then incubated with indicated SEM-Mb concentrations for 24 h. Apoptosis was assessed in triplicate by annexin V-propidium iodide double staining followed by flow cytometry, and percentage apoptosis is shown as percentage of annexin V-positive cells (mean $\pm$ SD, \* $P$  < 0.05). (C) Effect of SB202190 on SEM-Mb-induced TNF- $\alpha$  expression in THP-1, K562, Jurkat, and ABT-R U937 cells.

**Carboxyl groups of  
Asp, Glu, and C-  
terminus in myoglobin**

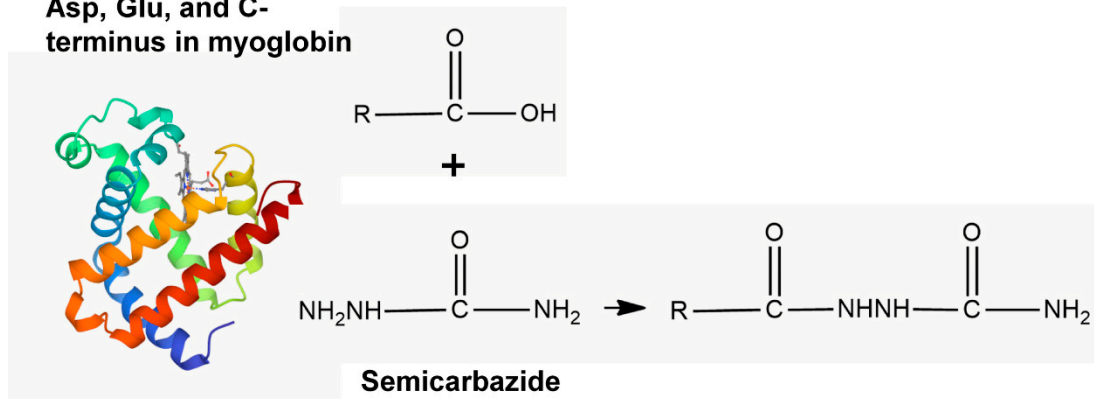

Figure S3. Schematic showing the modification of the carboxyl group in Mb with semicarbazide. Carboxyl groups in Mb were modified with semicarbazide according to the procedure described in [25].

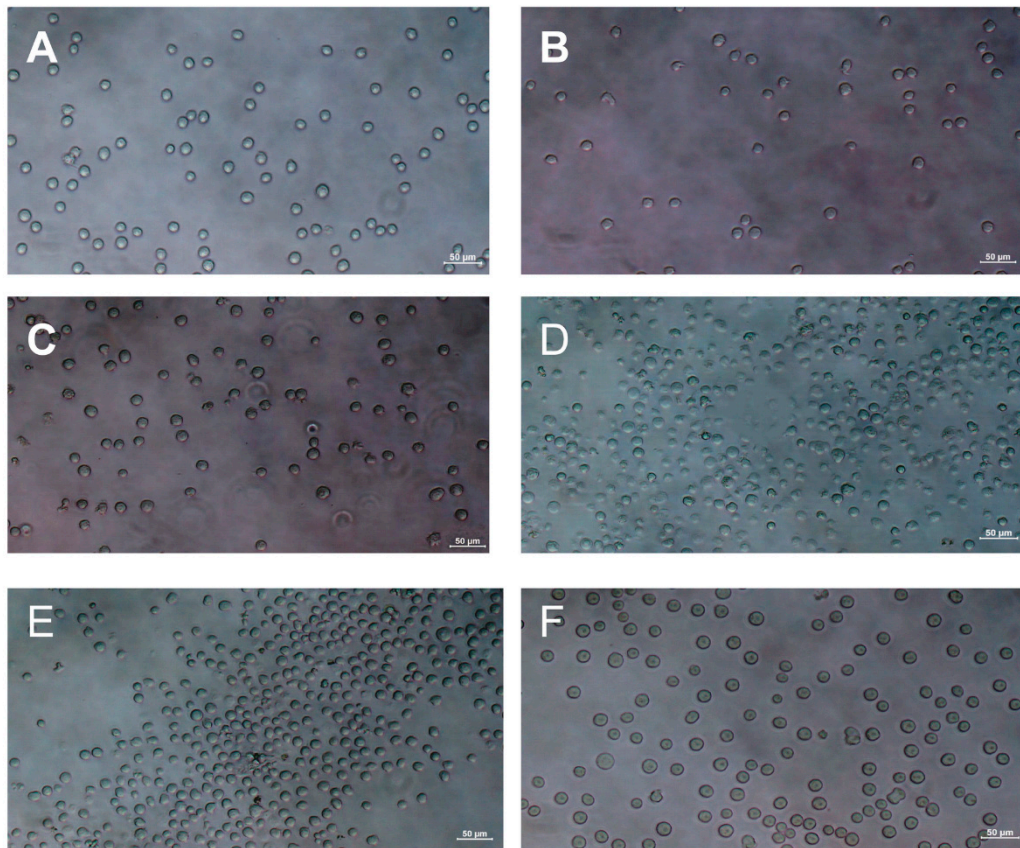

Figure S4. The morphologies of (A) U937, (B) ABT-199-resistant U937 cells, (C) HL-60, (D) THP-1, (E) Jurkat, and (F) K562 cells.
